# Supplementary material for: Combined Brain-Heart Magnetic Resonance Imaging in Autoimmune Rheumatic Disease Patients with Cardiac Symptoms: Hypothesis Generating Insights from a Cross-Sectional Study
Source: PubMed Central journal article supplement (PMC7074384; doi:10.3390/jcm9020447), 2020-02-06
Supplement: jcm-09-00447-s001.pdf [file jcm-09-00447-s001.pdf]

**Supplementary Table 1.** Results of univariable and multivariable ordered logistic regression analysis for predicting higher numbers of subcortical white matter lesions. Multivariable corrections were applied for age and sex.

| Variable                              | Univariable Ordered Logistic Regression |                   | Multivariable Ordered Logistic Regression |               |
|---------------------------------------|-----------------------------------------|-------------------|-------------------------------------------|---------------|
|                                       | OR (95% CI)                             | p-value           | OR (95% CI)                               | p-value       |
| LVEDV (per 5 mL)                      | 0.98 (0.94-1.02)                        | 0.318             | 1.0 (0.96-1.05)                           | 0.984         |
| LVESV (per 5 mL)                      | 0.99 (0.94-1.05)                        | 0.785             | 1.02 (0.96-1.09)                          | 0.466         |
| LVEF (per 5%)                         | 1.04 (0.82-1.33)                        | 0.729             | 0.95 (0.73-1.22)                          | 0.677         |
| RVEDV (per 5 mL)                      | 0.97 (0.93-1.02)                        | 0.220             | 1.00 (0.95-1.06)                          | 0.869         |
| RVESV (per 5 mL)                      | 0.96 (0.88-1.04)                        | 0.329             | 1.02 (0.92-1.12)                          | 0.718         |
| RVEF (per 5%)                         | 1.16 (0.84-1.60)                        | 0.378             | 1.01 (0.73-1.40)                          | 0.960         |
| T2 Signal Ratio                       | 1.36 (0.57-3.23)                        | 0.486             | 0.96 (0.39-2.36)                          | 0.935         |
| EGE (%)                               | 0.99 (0.89-1.09)                        | 0.832             | 0.98 (0.89-1.09)                          | 0.727         |
| LGE (%)                               | 1.06 (0.96-1.18)                        | 0.216             | 1.07 (0.96-1.18)                          | 0.238         |
| Native T1-Mapping (per 10 ms)         | 1.02 (0.97-1.07)                        | 0.437             | 0.97 (0.92-1.03)                          | 0.313         |
| Post-contrast T1-Mapping (per 10 ms)  | 0.94 (0.88-1.00)                        | 0.057             | 0.94 (0.88-1.01)                          | 0.113         |
| ECV (%)                               | 1.09 (0.99-1.20)                        | 0.081             | 1.06 (0.97-1.16)                          | 0.206         |
| T2-Mapping (ms)                       | 1.02 (0.97-1.08)                        | 0.332             | 0.99 (0.94-1.05)                          | 0.764         |
| ARD patients (compared with controls) | 6.25 (2.46-15.90)                       | <b>&lt;0.001*</b> | 5.02 (1.82-13.84)                         | <b>0.002*</b> |

ARD autoimmune rheumatic disease; LV- / RV left/right ventricular; EDV/ESV end-diastolic/-systolic volume; EF ejection fraction; EGE/LGE early/late gadolinium enhancement; ECV extracellular volume fraction

**Supplementary Table 2.** Results of univariable and multivariable ordered logistic regression analysis for predicting higher numbers of deep white matter lesions. Multivariable corrections were applied for age and sex.

| Variable                              | Univariable Ordered Logistic Regression |               | Multivariable Ordered Logistic Regression |               |
|---------------------------------------|-----------------------------------------|---------------|-------------------------------------------|---------------|
|                                       | OR (95% CI)                             | p-value       | OR (95% CI)                               | p-value       |
| LVEDV (per 5 mL)                      | 1.01 (0.97-1.05)                        | 0.720         | 1.03 (0.99-1.08)                          | 0.135         |
| LVESV (per 5 mL)                      | 1.02 (0.96-1.08)                        | 0.511         | 1.05 (0.99-1.12)                          | 0.101         |
| LVEF (per 5%)                         | 0.90 (0.71-1.14)                        | 0.395         | 0.83 (0.64-1.06)                          | 0.135         |
| RVEDV (per 5 mL)                      | 0.99 (0.94-1.03)                        | 0.553         | 1.01 (0.96-1.07)                          | 0.622         |
| RVESV (per 5 mL)                      | 0.98 (0.90-1.08)                        | 0.693         | 1.03 (0.93-1.14)                          | 0.553         |
| RVEF (per 5%)                         | 1.05 (0.77-1.43)                        | 0.768         | 0.97 (0.71-1.33)                          | 0.843         |
| T2 Signal Ratio                       | 1.08 (0.43-2.68)                        | 0.871         | 0.79 (0.29-2.15)                          | 0.643         |
| EGE (%)                               | 0.92 (0.78-1.08)                        | 0.300         | 0.92 (0.78-1.08)                          | 0.297         |
| LGE (%)                               | 1.09 (0.99-1.20)                        | 0.067         | 1.09 (0.99-1.21)                          | 0.091         |
| Native T1-Mapping (per 10 ms)         | 1.02 (0.97-1.07)                        | 0.407         | 0.98 (0.93-1.04)                          | 0.608         |
| Post-contrast T1-Mapping (per 10 ms)  | 0.93 (0.87-0.99)                        | <b>0.046*</b> | 0.94 (0.87-1.01)                          | 0.073         |
| ECV (%)                               | 1.19 (1.04-1.35)                        | <b>0.007*</b> | 1.16 (1.01-1.33)                          | <b>0.031*</b> |
| T2-Mapping (ms)                       | 1.03 (0.98-1.08)                        | 0.310         | 1.00 (0.95-1.06)                          | 0.916         |
| ARD patients (compared with controls) | 4.90 (1.76-13.67)                       | <b>0.002*</b> | 4.69 (1.49-14.74)                         | <b>0.008*</b> |

ARD autoimmune rheumatic disease; LV- / RV left/right ventricular; EDV/ESV end-diastolic/-systolic volume; EF ejection fraction; EGE/LGE early/late gadolinium enhancement; ECV extracellular volume fraction

**Supplementary Table 3.** Results of univariable and multivariable ordered logistic regression analysis for predicting higher numbers of periventricular white matter lesions. Multivariable corrections were applied for age and sex.

| Variable                                     | Univariable Ordered Logistic Regression |               | Multivariable Ordered Logistic Regression |               |
|----------------------------------------------|-----------------------------------------|---------------|-------------------------------------------|---------------|
|                                              | OR (95% CI)                             | p-value       | OR (95% CI)                               | p-value       |
| LVEDV (per 5 mL)                             | 1.00 (0.96-1.05)                        | 0.895         | 1.01 (0.96-1.06)                          | 0.708         |
| LVESV (per 5 mL)                             | 1.01 (0.95-1.07)                        | 0.770         | 1.02 (0.96-1.08)                          | 0.608         |
| LVEF (per 5%)                                | 1.03 (0.78-1.35)                        | 0.844         | 0.99 (0.75-1.31)                          | 0.962         |
| RVEDV (per 5 mL)                             | 0.99 (0.94-1.04)                        | 0.675         | 0.99 (0.93-1.05)                          | 0.766         |
| RVESV (per 5 mL)                             | 0.97 (0.87-1.07)                        | 0.522         | 0.97 (0.86-1.09)                          | 0.611         |
| RVEF (per 5%)                                | 1.30 (0.88-1.91)                        | 0.193         | 1.23 (0.83-1.82)                          | 0.298         |
| T2 Signal Ratio                              | 0.47 (0.15-1.42)                        | 0.180         | 0.35 (0.10-1.20)                          | 0.095         |
| EGE (%)                                      | 0.90 (0.72-1.13)                        | 0.355         | 0.90 (0.72-1.13)                          | 0.371         |
| LGE (%)                                      | 1.06 (0.95-1.19)                        | 0.290         | 1.06 (0.95-1.19)                          | 0.320         |
| Native T1-Mapping (per 10 ms)                | 0.98 (0.92-1.05)                        | 0.580         | 0.96 (0.90-1.04)                          | 0.305         |
| Post-contrast T1-Mapping (per 10 ms)         | 1.02 (0.94-1.11)                        | 0.579         | 1.03 (0.95-1.12)                          | 0.455         |
| ECV (%)                                      | 1.08 (0.95-1.23)                        | 0.251         | 1.08 (0.94-1.25)                          | 0.277         |
| T2-Mapping (ms)                              | 0.99 (0.93-1.06)                        | 0.738         | 0.98 (0.91-1.05)                          | 0.476         |
| <b>ARD patients (compared with controls)</b> | <b>3.63 (1.12-11.86)</b>                | <b>0.032*</b> | <b>4.82 (1.28-18.1)</b>                   | <b>0.020*</b> |

ARD autoimmune rheumatic disease; LV- / RV left/right ventricular; EDV/ESV end-diastolic/-systolic volume; EF ejection fraction; EGE/LGE early/late gadolinium enhancement; ECV extracellular volume fraction

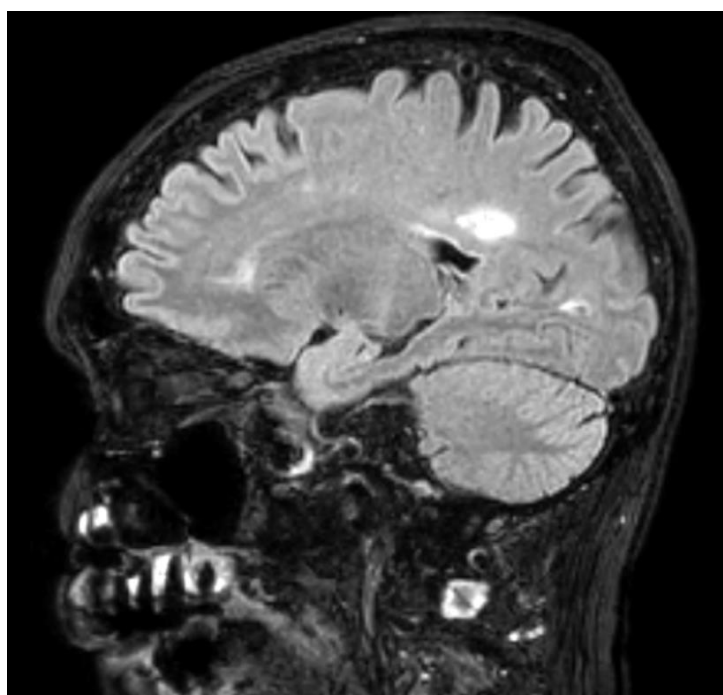

**Figure 1.** A fluid attenuation inversion recovery (FLAIR) image from a patient with sarcoidosis showing silent white matter hyperintensities.
